## RESEARCH ARTICLE

# Diagnostic performances of *Schistosoma haematobium* and *Schistosoma mansoni* recombinant proteins, peptides and chimeric proteins antibody based tests. Systematic scoping review

Arthur Vengesai<sup>1\*</sup>, Victor Muleya<sup>1</sup>, Herald Midzi<sup>2</sup>, Tryphine Vimbai Tinago<sup>2</sup>, Isaac Chipako<sup>3</sup>, Marble Manuwa<sup>2</sup>, Thajasvarie Naicker<sup>4</sup>, Takafira Mduluza<sup>2</sup>

**1** Department of Biochemistry, Faculty of Medicine and Health Sciences, Midlands State University, Gweru, Zimbabwe, **2** Department of Biochemistry, University of Zimbabwe, Mt Pleasant, Harare, Zimbabwe, **3** Aravas Pharmaceuticals Pvt LTD, Prospect Industrial Area, Harare, Zimbabwe, **4** Discipline of Optics and Imaging, Doris Duke Medical Research Institute, College of Health Sciences, University of KwaZulu-Natal, Durban, South Africa

\* [arthurvengesai@gmail.com](mailto:arthurvengesai@gmail.com)

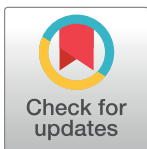

## OPEN ACCESS

**Citation:** Vengesai A, Muleya V, Midzi H, Tinago TV, Chipako I, Manuwa M, et al. (2023) Diagnostic performances of *Schistosoma haematobium* and *Schistosoma mansoni* recombinant proteins, peptides and chimeric proteins antibody based tests. Systematic scoping review. PLoS ONE 18(3): e0282233. <https://doi.org/10.1371/journal.pone.0282233>

**Editor:** Wannaporn Ittiprasert, George Washington University, UNITED STATES

**Received:** September 9, 2022

**Accepted:** February 11, 2023

**Published:** March 2, 2023

**Copyright:** © 2023 Vengesai et al. This is an open access article distributed under the terms of the [Creative Commons Attribution License](https://creativecommons.org/licenses/by/4.0/), which permits unrestricted use, distribution, and reproduction in any medium, provided the original author and source are credited.

**Data Availability Statement:** All relevant data are within the paper and its [Supporting information](#) files.

**Funding:** The author(s) received no specific funding for this work.

**Competing interests:** The authors have declared that no competing interests exist.

## Abstract

### Background

Traditional diagnostic tests for schistosome infections are suboptimal, particularly when the parasite burden is low. In the present review we sought to identify recombinant proteins, peptides, and chimeric proteins with potential to be used as sensitive and specific diagnostic tools for schistosomiasis.

### Methods

The review was guided by PRISMA-ScR guidelines, Arksey and O'Malley's framework, and guidelines from the Joanna Briggs Institute. Five databases were searched: Cochrane library, PubMed, EMBASE, PsycInfo and CINAHL, alongside preprints. Identified literature were assessed by two reviewers for inclusion. A narrative summary was used to interpret the tabulated results.

### Results

Diagnostic performances were reported as specificities, sensitivities, and AUC. The AUC for *S. haematobium* recombinant antigens ranged from 0.65 to 0.98, and 0.69 to 0.96 for urine IgG ELISA. *S. mansoni* recombinant antigens had sensitivities ranging from 65.3% to 100% and specificities ranging from 57.4% to 100%. Except for 4 peptides which had poor diagnostic performances, most peptides had sensitivities ranging from 67.71% to 96.15% and specificities ranging from 69.23% to 100%. *S. mansoni* chimeric protein was reported to have a sensitivity of 86.8% and a specificity of 94.2%.

## Conclusion

The tetraspanin CD63 antigen had the best diagnostic performance for *S. haematobium*. The tetraspanin CD63 antigen Serum IgG POC-ICTs had a sensitivity of 89% and a specificity of 100%. Peptide Smp\_150390.1 (216–230) serum based IgG ELISA had the best diagnostic performance for *S. mansoni* with a sensitivity of 96.15% and a specificity of 100%. Peptides were reported to demonstrate good to excellent diagnostic performances. *S. mansoni* multi-peptide chimeric protein further improved the diagnostic accuracy of synthetic peptides. Together with the advantages associated with urine sampling technique, we recommend development of multi-peptide chimeric proteins urine based point of care tools.

## Introduction

Schistosomiasis, otherwise known as bilharzia or the snail fever, is the second most significant tropical parasitic disease after malaria [1]. Despite significant global control efforts schistosomiasis continues to pose a major public health burden [2]. Schistosomiasis affects almost 240 million people worldwide, spanning least 78 countries and affecting more than 700 million people within endemic areas [3, 4]. Approximately 90% of the global cases occur in sub-Saharan Africa where approximately 300 000 deaths are estimated emanate from *S. mansoni* and *S. haematobium* infections [5]. Globally there are about 436 million people at risk of infection, with 112 million people infected with *S. haematobium*. *S. mansoni* is the main cause of intestinal schistosomiasis in Sub Saharan Africa places 393 million people at risk of infection and infects 54 million people globally [3, 4].

One of the major obstacles to sustained disease control and eradication is due to inadequate diagnostic approaches that are highly sensitive, inexpensive, rapid, and that can be utilized at the point of care [2, 6]. Sensitive diagnostic approaches play a vital role in, generating data that influence decisions on individual and community treatment, assessment of morbidity and evaluation of chemotherapy and other control measures [7, 8].

Traditional parasitological methods (Kato Katz technique and urine filtration) show low sensitivity, especially in infections of low intensity that are most likely encountered in interruption of transmission scenarios [9]. Moreover, many light infections are missed due to absence of eggs in urine and stool specimens [10–13]. Even in many high-endemic settings, the average infection intensity is often low, and microscopy alone may thus easily miss a considerable number of infections [14]. In addition, one of the caveats of microscopy as a diagnostic tool is that it is labour-intensive and time-consuming [15]. The failure of the traditional egg detection methods emphasises the need for more sensitive diagnostic methods to effectively control and monitor schistosomiasis.

While alternative methods for schistosomiasis diagnosis are available, these methods have shortcomings. One of the alternative diagnostic procedures is the PCR-based method, which confers high specificity and sensitivity in detecting schistosome infections. However, the method is expensive and requires skilled personnel which are not readily available in remote rural settings [7, 16]. The point-of-care circulating cathodic antigen test is considerably more sensitive than the Kato-Katz technique but shows low sensitivity when compared to ELISA in low infection intensity cases [17, 18]. Moreover, it has been noted that the POC-CCA tends to give false negative results for light intensity infections [19]. On the other hand, serological based tests such as ELISAs using crude antigens such as soluble egg antigens, increases

diagnostic accuracy in low burden areas. However, crude antigens are of limited value in endemic regions because of high costs of production, low-specificity and they often cross-react with other helminths [20].

## Review aims and objectives

In this scoping review, we sought to identify recombinant proteins, peptides and chimeric proteins with potential applications in diagnosis of *S. haematobium* and *S. mansoni*. In line with the WHO Department of Control of Neglected Tropical Diseases Diagnostic Technical Advisory Group, we aim to identify recombinant proteins, peptides and chimeric proteins that can be used to develop sensitive, point of care diagnostics for *S. haematobium* and *S. mansoni* in different prevalence settings that can be used for surveillance and transmission assessment.

## Methods

This review was conducted using PRISMA-ScR guidelines (S1 Table) to search and select relevant studies for inclusion in the scoping review [21]. The methodological framework proposed by Arksey and O'Malley (2005) and further refined by the Joanna Briggs Institute [22, 23] was used to develop the protocol and guide data extraction. Our methodology was also based upon previous reviews by our group [24, 25] in conjunction with other relevant scoping reviews [26–28]. As a scoping review is a continual process, the methodology was continuously revised as the review progressed.

## Search strategy

**Electronic searches.** The Cochrane library, PubMed, EMBASE, PsycInfo and CINAHL databases were systematically searched for relevant articles without any language restrictions. To maximise relevance of the findings, literature search included the time frame of January 2000 to February 2022. The databases were searched using variations and combinations of the following keywords: recombinant proteins, peptides, and schistosomiasis. The search strategy and results for all databases are S1 File.

**Searching other resources.** Preprint databases MedRxiv and BioRxiv were also searched. The reference lists of relevant reviews and studies and websites of the World Health Organization (WHO), the Schistosomiasis Control Initiative (SCI), and the Schistosomiasis Consortium for Operational Research and Evaluation (SCORE) were also screened for additional articles.

## Criteria for considering studies for this review (inclusion and exclusion criteria)

Cross-sectional, longitudinal, case-control, diagnostic accuracy studies and clinical trials, looking at human *S. haematobium* and/or *S. mansoni* infections and recombinant antigens and/or peptides diagnostic serological assays were included in the scoping review. In cases where there were different subpopulations, the overall diagnostic accuracy was considered. On protein microarrays, antigens able to effectively discriminate between schistosomiasis infected and non-infected populations using sera or urine were considered.

Studies were excluded if:

- Combinations of recombinant antigens
- Full text and abstract were both unavailable or only the abstract was available but did not convey the needed data.
- Conference abstract

- Human *Schistosoma* infection was not investigated.
- Data from the *Schistosoma*-only infections could not be extracted.
- Narrative reviews.
- Circulating anodic (CAA) and cathodic (CCA) antigen or other commercially available antigens were being investigated
- Animal models

## Review process and data charting

One reviewer independently assessed the eligibility of the abstracts, downloading relevant articles into Mendeley reference manager, whilst removing duplicate articles. After removing duplicates shortlisted articles were screened for inclusion through full-text analysis. Two reviewers independently assessed the eligibility of the full text articles. After the articles were selected, two authors extracted and recorded the data from each study according to a pre-defined data extraction excel spreadsheet form. A third reviewer was consulted to resolve disagreements. The extracted data included author, year of publication, DOI, study design, aim and study domain, country where study was conducted, schistosome species, serological assay type, sample characteristics, negative control, reference standard, antigen type, antibody type, index test and diagnosis accuracy of antigen (sensitivity and specificity).

## Methodological quality appraisal and data synthesis

Methodological quality or risk of bias of the included articles was not appraised, which is consistent with guidance on scoping review conduct [22]. Descriptive numerical analysis was performed and a narrative summary was used to interpret the tabulated results and describe how they relate to the review's aim and questions [29].

## Results and discussion

### Identification of potential studies

Electronic searches of five databases Pubmed (n = 3893) CINAHL (n = 1629), Cochrane library (n = 143), PsycINFO (n = 16) and EMBASE (n = 2239) yielded 6396 potential articles for inclusion in the review. Additional articles (n = 15) identified through other sources led to a total of 6411 titles and abstracts eligible for screening. A total of 62 full text articles were screened for eligibility after the removal of duplicate articles (n = 19) and irrelevant articles (n = 6330). Full text screening led to a total of 14 articles that were included in the systematic scoping review. Fig 1 is demonstrating the flow chart of the studies identification and selection process. A total 48 studies were excluded from the review after full text screening and reasons for exclusion are given Fig 1 and S2 Table.

### Characteristics of the included articles

All the articles included in the review were non-randomized controlled trials. Among the articles selected, one was a preprint [30]. The general characteristics of the articles included in the scoping review are shown in Table 1. The articles included were from 6 countries Brazil (n = 7), Australia (n = 2), Kenya (n = 2), United Kingdom (n = 1), Spain (n = 1), and Italy (n = 1). All the included studies were investigating human schistosome immunodiagnostics, apart from one study by Mekonnen and colleagues [31] who also used a mouse model to

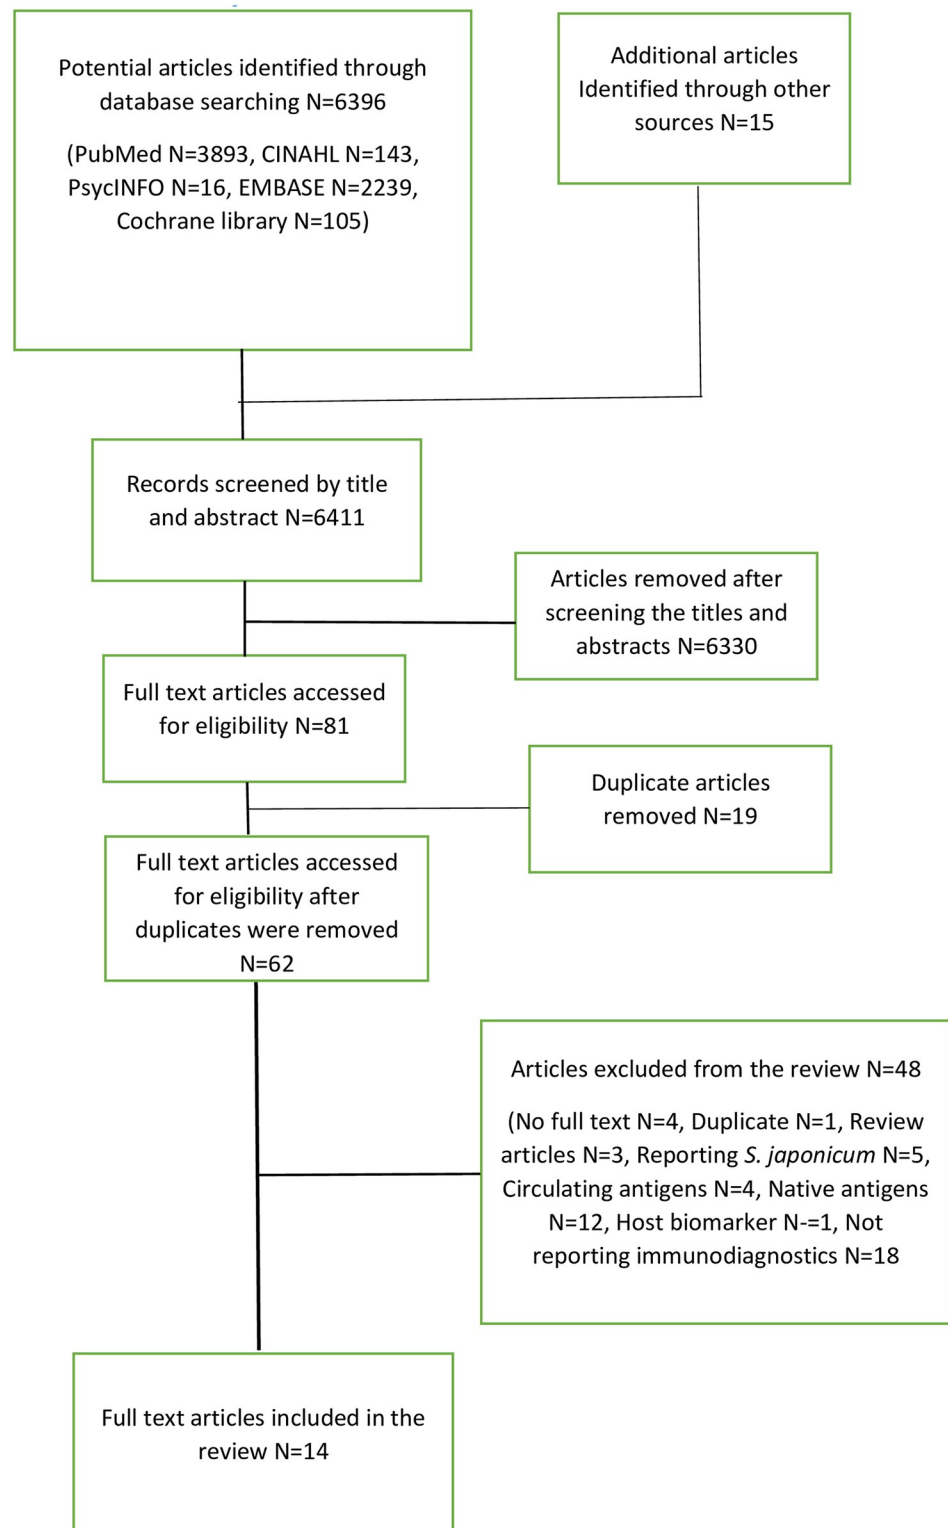

**Fig 1. Flow chart of the studies identification and selection process.**

<https://doi.org/10.1371/journal.pone.0282233.g001>

Table 1. General characteristics of the studies included in the review.

| Index test                                | Species                                 | Study Population | Sample characteristic  | Control                       | Antibody type | Reference test                                  | Geographic location | Year            | Reference                         |
|-------------------------------------------|-----------------------------------------|------------------|------------------------|-------------------------------|---------------|-------------------------------------------------|---------------------|-----------------|-----------------------------------|
| Protein microarray, ELISA, and POC-ICTs   | <i>S. haematobium</i>                   | Humans           | Serum/plasma and Urine | Specificity control sera      | IgG           | Egg detection                                   | Australia           | 2021            | Mark S Pearson [35]               |
| ELISA                                     | <i>S. haematobium</i>                   | Humans and mice  | Urine                  | Healthy negative control sera | IgG           | Egg detection                                   | Australia           | 2022            | Gebeyaw G. Mekonnen [31]          |
| ELISA                                     | <i>S. mansoni</i>                       | Humans           | Serum/plasma           | Specificity control sera      | IgG           | Egg detection                                   | Brazil              | 2008            | E. De Oliveira [36]               |
| ELISA                                     | <i>S. mansoni</i>                       | Humans           | Serum/plasma           | Healthy negative control sera | IgG           | Egg detection                                   | Brazil              | 2017            | Gardenia B. F. Carvalho [16]      |
| ELISA                                     | <i>S. mansoni</i>                       | Humans           | Serum/plasma           | Healthy negative control sera | IgG           | Egg detection                                   | Brazil              | 2017            | Marcelo D. Lopes [37]             |
| ELISA                                     | <i>S. mansoni</i>                       | Humans           | Serum/plasma           | Healthy negative control sera | IgG           | Egg detection                                   | Brazil              | 2019            | Vanessa Silva-Moraes [38]         |
| ELISA                                     | <i>S. mansoni</i>                       | Humans           | Serum/plasma           | Healthy negative control sera | IgG and IgM   | Egg detection                                   | Brazil              | 2020            | Mambellia, F.S. [33]              |
| DELFI and Protein microarray immunoassays | <i>S. mansoni</i>                       | Humans           | Serum/plasma           | Healthy negative control sera | IgG           | Bordier Affinity Products CH and Egg detection. | Italy               | 2021            | Stefano De Benedetti [39]         |
| ELISA                                     | <i>S. mansoni</i>                       | Humans           | Serum/plasma           | Healthy negative control sera | IgG           | Egg detection                                   | Kenya               | 2021            | Mio Tanaka [17]                   |
| ELISA                                     | <i>S. mansoni</i>                       | Humans           | Serum/plasma           | Specificity control sera      | IgG           | Egg detection                                   | United Kindom       | 2010            | Bahaa El Deen Wade El Aswada [20] |
| Luminex multiplex immunoassay             | <i>S. mansoni</i> <i>S. haematobium</i> | Humans           | Serum/plasma           | Healthy negative control sera | IgG           | Egg detection                                   | Kenya               | 2015            | Tanigawa [40]                     |
| Luminex multiplex immunoassay             | <i>S. mansoni</i> <i>S. haematobium</i> | Humans           | Serum/plasma           | Healthy negative control sera | IgG           | Egg detection                                   | Spain               | 2022 (Preprint) | Rebeca Santano [30]               |
| ELISA                                     | <i>S. mansoni</i>                       | Humans           | Serum/plasma           | Specificity control sera      | IgG           | Egg detection                                   | Brazil              | 2003            | E. Makarova [41]                  |
| ELISA and western blot                    | <i>S. mansoni</i>                       | Humans           | Serum/plasma           | Specificity control sera      | IgG           | Egg detection                                   | Brazil              | 2005            | E. Makarova [42]                  |

Dissociation-Enhanced Lanthanide Fluorescence ImmunoAssays (DELFI)

Point of care immunochromatographic tests (POC-ICT)

<https://doi.org/10.1371/journal.pone.0282233.t001>

investigate schistosome immunodiagnostics. Most of the articles (71.42%) included in the review sought to identify peptides and recombinant proteins with potential applications in the detection of *S. mansoni*. Only 28.58% (n = 4) sought to identify peptides and recombinant proteins with potential applications in the detection of *S. haematobium*. Two articles investigated immunodiagnostics of both species. Although IgM has better diagnostic features than IgG responses [32], only one study, by Mambelli and colleagues, investigated IgM based serological test [33]. Like most available assays most of studies included in the review detected IgG only which have been reported to be more specific than IgM [34]. The study by Mambelli and colleagues investigated both IgG and IgM [33].

**Negative controls.** Negative controls are primarily used to evaluate the specificity of a test. In other words, negative controls are used to correctly identify individuals without parasitic infections (the true negatives) while minimizing false positive results as determined by the reference method [43, 44]. Negative controls generally consist of tissues (including blood) where the target proteins for instance antibodies are known to be absent [34]. In the current review, all negative sera were obtained from schistosomiasis unexposed individuals without *Schistosoma* infections and without a history of contact with contaminated water. Negative controls can be differentiated into normal negative controls (from healthy individuals) or specificity controls from individuals (from individuals infected with other parasites) [35, 41, 42, 45]. Specificity controls are important to determine whether a test can designate an individual who do not have the target infection as negative. In the present review most of the studies (N = 9) used normal controls as the negative control and only 5 studies used specificity controls as the negative control.

**Antibody-detection tests and antigen-detection tests.** Studies included in the present review used antibody-detection tests that have been merited with high sensitivity. These antibody detection tests included ELISA (used in 80% of the studies) and point of care immunochromatographic tests (POC-ICT) (used in one study [35]) which are easy to perform [46]. These antibody-detection tests are indirect tests that look for schistosome antibodies in body fluids such as serum, plasma and urine that are produced in response to infections by schistosome species [47, 48]. Ideally, a serological test must use a single and specific schistosome antigen that is recognized by the immune response of all schistosome infected humans. The response of the test should be approximately proportional to the worm burden and would rapidly fall towards zero when the stimulus provided by infection was eliminated by praziquantel chemotherapy [32]. However, the antibody-detection tests included in the review have been found to be disadvantageous in that they have low specificity and do not accurately reflect the presence of active infections particularly in endemic areas. Antibodies may persist systemically for many months to years after successful treatment. This implies that antibody detection tests are unable to differentiate between acute or past infections nor discrimination between persisting antibodies and reinfection. [46, 49, 50]. Additional antibody-detection tests do not reflect infection intensity [46]. They are beneficial in patients with infrequent exposure to schistosome cercariae, such as tourists visiting an endemic area [32]. Fortunately, there may be certain antigens to which specific antibody isotype subclasses such as IgG<sub>4</sub>, disappear more rapidly [9]. These antibodies can be targeted to circumvent the limitation associated with persisting antibodies.

Antigen-detection tests are a better alternative in the diagnosis of schistosome infections as they differentiate between active and past infections, because the circulating antigens are present only when there is active infection [46, 48]. Since circulating antigens are released from living worms, antigen levels may correlate directly with parasite load, unlike microscopy and antibody-detection tests. This may make antigen-detection tests useful in monitoring the dynamics of worm burdens and clearance of worms after treatment [48]. Furthermore, antigen-detection tests allow for non-invasive diagnosis as antigens are cleared from the human circulation via the kidneys and can be detected in urine [51]. However, it is noteworthy to mention that antigen-detection tests exhibit low sensitivity [46].

**Invasive venepuncture and non-invasive urine sampling.** Urine sampling is a generally painless, more convenient, less expensive, and non-invasive technique hence of low risk. Urine sampling negates the need for well-trained personnel, is better accepted by patients and is usually obtained immediately upon request [46, 52]. Pearson and colleagues furthermore reported that urine IgG signal intensity was significantly correlated with schistosome infection intensity but reported no correlation between infection intensity and serum IgG signal intensity [35].



Despite the significant advantages of the ease and non-invasive urine sampling only two studies included in this review used this technique. Henceforth, most studies 93% (n = 14) included in the review involved the invasive collection of blood via venepuncture. Apart from the obvious risk of infection associated with venepuncture, the technique is painful, onerous, and highly invasive for children. Venepuncture is a limiting technique because it requires specific equipment and well-trained personnel seldom available in schistosomiasis endemic rural areas. In addition, venepuncture is not widely accepted especially by children and certain ethnic and religious groups [53, 54]. Also, the serum and/or plasma samples utilized in the studies reported in the review requires blood separation which can be difficult in field conditions as it requires a centrifuge [54]. However, it should be noted that the increased amount of antibodies in serum maximise the success of pilot tests, which could then be optimized for use with urine [35]. An alternative could be utilization of finger prick blood sampling based tests which are easier to use and easy to develop it into a point of care test or self-use test. However, tests are less sensitivity compared to tests based on venepuncture sampling [55]. Alternatively, saliva may be used as a non-invasive alternative to serum. Zhou and colleagues (2009) reported the use of recombinant Sj13 as an antigenic target in an IgG-ELISA using saliva and showed comparable performance to SjSWA-IgG ELISA in serum and a low cross-reactivity in *S. japonicum* endemic areas [56].

### ***S. haematobium* and *S. mansoni* recombinant antigens**

For narrative review, recombinant antigens were grouped into 11 schistosome protein families. serine protease inhibitors (SERPIN), Pur DNA binding protein, MEC 2, tetraspanin, peptidases, ferritins and haemoglobinase for *S. haematobium* (Table 2). Chaperone, micro-exon gene (MEGs) proteins, saposin-like proteins (SAPLIP) and calreticulin were identified for *S. mansoni* (Table 3). The diagnostic performance of *S. haematobium* recombinant antigens measured using area under the curve (AUC) ranged from 0.65 (95% CI 0.54–0.76) [ferritin heavy polypeptide Urine IgG protein microarray] to 0.98 (95% CI 0.95–1.00) [Sh-TSP2 tetraspanin serum IgG ELISA]. The non-invasive relatively easy to use urine IgG ELISA AUC ranged from 0.69 (95% CI 0.62–0.77) to 0.96 (95% CI 0.93–0.99). *S. mansoni* recombinant antigens had sensitivities ranging from 65.3% (95% CI 55.0–76.6%) [CCD60071 SERPIN IgG ELISA] to 100% [RP26 SAPLIP serum IgG western blot] and specificities ranging from 57.4% (95% CI 55.0–76.6%) [AAB1008 RP26 SAPLIP serum IgG ELISA] to 100% [AAB1008 RP26 SAPLIP serum IgG western blot].

**Saposin-like proteins (SAPLIP).** Saposin-like proteins are a multi-gene family of *Schistosoma* species that are potential biomarkers for the immunodiagnosis of schistosome infections [6, 62]. SAPLIPs expressed in the gastrodermis are involved in lysis of ingested host red blood cells in the gut of the parasite. These SAPLIPs may be continuously released into the host circulatory system in worm vomitus, stimulating the host to produce a strong immune response [62, 63]. In the present review *S. mansoni* RP26 a member of the SAPLIP multi-gene family was reported to have sensitivities ranging from 67.80% [Serum IgG luminex immunoassay] to 100% [Serum IgG Western blot] and specificities ranging from 57.4% [Serum IgG ELISA] to 100% [Serum IgG Western blot] [17, 40]. It was furthermore noted that RP26 may be particularly useful in developing tools for monitoring progress of chemotherapy intervention by detecting new infections. RP26 is expressed at the cercarial, schistosomula and immature worms' stages, and not in the egg stage. This suggests that it has potential to detect acute schistosome infections [40]. Tanigawa and colleagues indeed found that mean IgG reactivity to RP26 was significantly higher during acute schistosomiasis, compared to the negative reaction observed to sera from chronic schistosomiasis [40].



Table 2. Diagnostic performance *S. haematobium* recombinant antigens antibody detection tests.

| Antigen (accession) | Description                               | Protein family                        | Serological assay             | Sensitivity | Specificity | AUC& (95% CI)    | Reference                |
|---------------------|-------------------------------------------|---------------------------------------|-------------------------------|-------------|-------------|------------------|--------------------------|
| MS3_10385           | neuroserpin+                              | Serpin [35]                           | Serum IgG protein microarray  | -           | -           | 0.88 (0.83–0.92) | Mark S Pearson [35]      |
| MS3_10186           | IPSE                                      | None predicted [57]                   | Serum IgG protein microarray  | -           | -           | 0.88 (0.83–0.92) |                          |
| MS3_06193           | PUR-alpha-like protein                    | PUR DNA binding protein (uniprot.org) | Serum IgG protein microarray  | -           | -           | 0.71 (0.64–0.79) | Gebeyaw G. Mekonnen [31] |
| MS3_01466           | band 7 protein                            | Mec 2 (uniprot.org)                   | Serum IgG protein microarray  | -           | -           | 0.69 (0.62–0.75) |                          |
| MS3_05950           | 16 kDa calcium-binding protein            | None predicted [57]                   | Serum IgG protein microarray  | -           | -           | 0.76 (0.70–0.82) | Tanigawa [40]            |
| MS3_09198           | CD63 antigen+                             | Tetraspanin (uniprot.org)             | Serum IgG protein microarray  | -           | -           | 0.79 (0.73–0.85) |                          |
| MS3_09779           | cathepsin B-like peptidase (C01 family) + | Peptidase C1 (uniprot.org)            | Serum IgG protein microarray  | -           | -           | 0.84 (0.76–0.93) | Rebeca Santano [30]      |
| MS3_07972           | ferritin, heavy polypeptide 1+            | Ferritin (uniprot.org)                | Serum IgG protein microarray  | -           | -           | 0.86 (0.80–0.92) |                          |
| MS3_09207           | hemoglobinase (C13 family) +              | Peptidase C13 (uniprot.org)           | Serum IgG protein microarray  | -           | -           | 0.78 (0.71–0.84) | Tanigawa [40]            |
| MS3_01370           | CD63 antigen+                             | Tetraspanin [35]                      | Serum IgG protein microarray  | -           | -           | 0.78 (0.71–0.84) |                          |
| MS3_10385           | neuroserpin                               | Serpin [35]                           | Urine IgG protein microarray  | -           | -           | 0.93 (0.85–1.00) | Gebeyaw G. Mekonnen [31] |
| MS3_10186           | IPSE                                      | None predicted [57]                   | Urine IgG protein microarray  | -           | -           | 0.88 (0.80–0.97) |                          |
| MS3_06193           | PUR-alpha-like protein                    | PUR DNA binding (uniprot.org)         | Urine IgG protein microarray  | -           | -           | 0.83 (0.75–0.91) | Tanigawa [40]            |
| MS3_01466           | band 7 protein                            | Mec 2 (uniprot.org)                   | Urine IgG protein microarray  | -           | -           | 0.75 (0.66–0.84) |                          |
| MS3_05950           | 16 kDa calcium-binding protein            | None predicted (uniprot.org)          | Urine IgG protein microarray  | -           | -           | 0.72 (0.62–0.82) | Rebeca Santano [30]      |
| MS3_09198           | CD63 antigen+                             | Tetraspanin [35]                      | Urine IgG protein microarray  | -           | -           | 0.83 (0.73–0.92) |                          |
| MS3_09779           | cathepsin B-like peptidase (C01 family) + | Peptidase C1 (uniprot.org)            | Urine IgG protein microarray  | -           | -           | 0.66 (0.55–0.76) | Tanigawa [40]            |
| MS3_07972           | ferritin, heavy polypeptide 1+            | Ferritin (uniprot.org)                | Urine IgG protein microarray  | -           | -           | 0.65 (0.54–0.76) |                          |
| MS3_09207           | hemoglobinase (C13 family) +              | Haemoglobinase (uniprot.org)          | Urine IgG protein microarray  | -           | -           | 0.68 (0.57–0.78) | Tanigawa [40]            |
| MS3_01370           | CD63 antigen                              | Tetraspanin (uniprot.org)             | Urine IgG protein microarray  | -           | -           | 0.66 (0.56–0.77) |                          |
| MS3_10385           | Neuroserpin+                              | Serpin [35]                           | Serum IgG ELISA               | -           | -           | 0.80 (0.70–0.91) | Gebeyaw G. Mekonnen [31] |
| MS3_10186           | IPSE                                      | Tetraspanin [35]                      | Serum IgG ELISA               | -           | -           | 0.88 (0.82–0.94) |                          |
| MS3_09198           | CD63 antigen+                             | Tetraspanin (uniprot.org)             | Serum IgG ELISA               | -           | -           | 0.82 (0.74–0.91) | Tanigawa [40]            |
| MS3_01370           | CD63 antigen                              | Tetraspanin [35]                      | Serum IgG ELISA               | -           | -           | 0.93 (0.89–0.97) |                          |
| Sh-TSP2             |                                           | Tetraspanin [31]                      | Serum IgG ELISA               | -           | -           | 0.98 (0.95–1.00) | Rebeca Santano [30]      |
| MS3_10385           | Neuroserpin+                              | Serpin [35]                           | Urine IgG ELISA               | -           | -           | 0.78 (0.71–0.86) |                          |
| MS3_10186           | IPSE                                      | Tetraspanin [35]                      | Urine IgG ELISA               | -           | -           | 0.69 (0.62–0.77) | Tanigawa [40]            |
| MS3_09198           | CD63 antigen+                             | Tetraspanin (uniprot.org)             | Urine IgG ELISA               | -           | -           | 0.78 (0.67–0.88) |                          |
| MS3_01370           | CD63 antigen                              | Tetraspanin [35]                      | Urine IgG ELISA               | -           | -           | 0.81 (0.72–0.89) | Rebeca Santano [30]      |
| Sh-TSP2             |                                           | Tetraspanin [31]                      | Urine IgG ELISA               | -           | -           | 0.96 (0.93–0.99) |                          |
| MS3_01370           | CD63 antigen                              | Tetraspanin [35]                      | Serum IgG POC-ICTs            | 89%         | 100%        | -                | Gebeyaw G. Mekonnen [31] |
| Sh-TSP2             |                                           | Tetraspanin [31]                      | Serum IgG POC-ICTs            | 75%         | 100%        | -                |                          |
| Sh-TSPS-4           |                                           | Tetraspanin [31]                      | Urine IgG ELISA               | -           | -           | 0.87             | Tanigawa [40]            |
| Sh-TSPS-5           |                                           | Tetraspanin [31]                      | Urine IgG ELISA               | -           | -           | 0.93             |                          |
| Sh-TSPS-18          |                                           | Tetraspanin [31]                      | Urine IgG ELISA               | -           | -           | 0.88             | Rebeca Santano [30]      |
| AAA19730            | Serine protease inhibitor                 | Serpin [56]                           | Serum IgG Luminex immunoassay | 92.5%       | 90%         | 0.947            |                          |
| Sm 25               |                                           |                                       | Serum IgG Luminex immunoassay | -           | -           | 0.711            |                          |

Serine protease inhibitor (SERPIN)

Point of care immunochromatographic tests (POC-ICT)

<https://doi.org/10.1371/journal.pone.0282233.t002>

Table 3. Diagnostic performance of *S. mansoni* recombinant antigens antibody detection tests.

| Antigen (accession)    | Description               | Protein family     | Serological assay             | Sensitivity                | Specificity              | AUC& (95% CI) | Reference                         |
|------------------------|---------------------------|--------------------|-------------------------------|----------------------------|--------------------------|---------------|-----------------------------------|
| Smp_049250.1           | Major egg antigen         | Cheparone [38, 59] | Serum IgG ELISA               | 87.1 (95% CI 78.55–93.15%) | 89.09% (77.75–95.89%)    | -             | Vanessa Silva-Moraes [38]         |
| Smp_138060—CCD60408.1  | MEG 3.2                   | MEG 3 [33]         | Serum IgM ELISA               | 90%                        | 70%                      | -             | Mambellia, F.S. [33]              |
| Smp_138060—CCD60408.1  | MEG 3.2                   | MEG 3 [33]         | Serum IgG ELISA               | 90%                        | 83%                      | -             |                                   |
| Smp_138090—CAZ30619.1) | MEG 3.4                   | MEG 3 [33]         | Serum IgM ELISA               | 75%                        | 90%                      | -             |                                   |
| SmSPI                  | Serine protease inhibitor | Serpin [60]        | Serum IgG protein microarray  | 91.7%                      | 93.3%                    | -             | Stefano De Benedetti [39]         |
| SmSPI                  | Serine protease inhibitor | Serpin [17, 60]    | Serum IgG DELFIA              | 83.7%                      | 61.4%                    | -             |                                   |
| AAB81008               | RP 26                     | SAPLIP [40, 61]    | Serum IgG ELISA               | 74.5% (95% CI 66.7–82.8%)  | 57.4% (95% CI 47.2–67.2) | -             | Mio Tanaka [17]                   |
| CCD60071               | Serine protease inhibitor | Serpin [17, 60]    | Serum IgG ELISA               | 65.3% (95% CI 55.0–74.6%)  | 62.4% (52.2–71.8%)       | -             |                                   |
| Sm CRT                 | Calreticulin              | Calreticulin [20]  | Serum IgG ELISA               | 89.7%                      | 100%                     | -             | Bahaa El Deen Wade El Aswada [20] |
| AAB81008               | RP 26 (Sm 22.3)           | SAPLIP [40]        | Serum IgG Luminex immunoassay | 67.8%                      | 89.5%                    | 0.833         | Tanigawa [40]                     |
| CCD60071               | Serine protease inhibitor | Serpin [17, 60]    | Serum IgG Luminex immunoassay | 89.4%                      | 81.5%                    | 0.888         |                                   |
|                        | Major egg antigen (ME)    | Cheparone [38, 59] | Serum IgG Luminex immunoassay | -                          | -                        | 0.746         | Rebeca Santano [30]               |
|                        | Sm 25                     |                    | Serum IgG Luminex immunoassay | -                          | -                        | 0.741         |                                   |
|                        | RP 26                     | SAPLIP [17]        | Serum IgG western blot        | 100%                       | 100%                     | -             | E. Makarova [41]                  |
|                        | RP 26                     | SAPLIP [17]        | Serum IgG western blot        | 89%                        | -                        | -             | E. Makarova [42]                  |

Dissociation-Enhanced Lanthanide Fluorescence ImmunoAssays (DELFIAs)

Saprosin-like proteins (SAPLIP)

Serine protease inhibitor (SERPIN)

Micro-exon gene (MEGs)

<https://doi.org/10.1371/journal.pone.0282233.t003>

**Serine protease inhibitors (SERPINS).** SERPINS are interesting immunodiagnostic targets, due to their presence at the parasite-host interface, where they are crucial for the adaptation and survival of the parasite to the host environment by modulating inflammatory response [17]. Amongst the studies that have investigated *S. haematobium*, SERPINS AUC ranged from 0.78 (95% CI 0.71–0.86) to 0.947. Urine IgG ELISA had the lowest diagnostic accuracy of 0.78 (95% CI 0.71–0.86) and serum IgG Luminex immunoassay had the highest diagnostic accuracy with an AUC of 0.947, a sensitivity of 92.50% and specificity of 90%. Amongst the studies that investigated *S. mansoni*, SERPINS sensitivity ranged from 65.3% (95% CI 55.0–74.6) [Serum IgG ELISA] to 91.70% [Serum IgG protein microarray] and specificity ranged from 61.40 [Serum IgG DELFIA] to 93.30% [Serum IgG protein microarray]. The SERPINS SmSPI and CCD60071 were reported to show species-specific diagnosis of *S. mansoni*. Antibodies raised against SmSPI *S. haematobium* homolog did not recognize *S. mansoni* SmSPI [17, 40]. However, despite *S. haematobium* AAA19730 SERPIN performing well for the diagnosis of *S. haematobium* it showed cross-reactivity with sera from infections caused by *S. mansoni* [40].

**Tetraspanins.** Tetraspanins, also known as the trans-membrane 4 super-family, comprise a collection of surface antigens that are widely expressed in the schistosome species [64]. These antigens are abundantly present in different parasite proteomes and could be potential diagnostic candidates due to their accessibility to the host immune system [31, 64]. In the present review of *S. haematobium*, tetraspanins were reported to have relatively good diagnostic performance. Their AUC ranged from 0.66 (95% CI 0.56–0.77) to 0.96 (95% CI 0.93–0.99). Urine IgG ELISA AUC ranged from 0.69 (95% CI 0.62–0.77) to 0.96 (95% CI 0.93–0.99). Urine based POC LFIA had a sensitivity that ranged from 75% to 89% with a specificity of 100% [31, 35].

**Calreticulin.** Pathogenic species of schistosome including *S. mansoni* and *S. haematobium* secrete and express calreticulin on their surface [20] making it a potential diagnostic candidate for schistosome species identification. Indeed, Aswada and colleagues reported that *S. mansoni* calreticulin serum based IgG ELISA had a sensitivity of 89.70% and a specificity of 100% [20].

**Micro-exon gene proteins.** Micro-exon gene proteins are also potential candidates for diagnosis of schistosomiasis as they are highly expressed in schistosome life cycle that are associated with the host infection and immune evasion by schistosome species [33]. MEG-3.2 distinguished sera of *S. mansoni* infected individuals from non-infected ones, supporting its potential for the development of a MEG based diagnostic tool [33]. *S. mansoni* MEG, serum based IgM ELISA was reported to have sensitivities ranging from 75% to 90% and specificities ranging from 70% to 90% and serum based IgG ELISA was reported to have a sensitivity of 90% and a specificity of 83% [33].

The antibody based tests described in this review have several advantages compared to the parasitological diagnosis. These include high sensitivity over parasitological methods, relatively easy to automation, large scale processing of samples and POC-ICT are less time consuming [6, 36, 65]. However, the antibody based tests also have several limitations. Schistosome-specific antibodies remain detectable for a long period after the infection has been cured. Consequently, measuring anti-schistosome antibody titres in serum may not discriminate between current and past infections [36, 65]. Cross reactivity between antigens from *Schistosoma* species and other co-endemic helminths such as soil transmitted helminths may occur due to shared antigenic epitopes [36, 65]. Antibody concentrations do not necessarily correlate with infection intensity [36]. In this review only SERPIN CCD60071 had a correlation with infection intensity [40]. This has clinical implications in confirmation of successful praziquantel treatment since specific antibodies may persist long after the worms have disappeared [36]. Lack of reproducibility between different batches of reagents may further hinder or delay implementation of new diagnostics [65].

## Peptides

One way to circumvent the problems associated with antibody based tests is the use of synthetic peptides which are well defined, easily produced in large amounts when required, highly pure with almost no batch-to-batch variation and they are very stable and cost-saving compared to the production of natural antigens in animal models or from *in vitro* culture [24, 66, 67].

The use of synthetic peptides composed of species-specific and conserved epitopes have a potential of minimising cross-reactivity whilst improving specificity and sensitivity [36, 68, 69]. Furthermore, *in silico* discovery of immunoreactive B cell epitopes may allow the design of species-specific epitopes for serological diagnosis. Moreover, the possibility of construction of multi-epitopic chimeric proteins could improve the diagnostic accuracy of synthetic peptides [37, 70].

Table 4. Diagnostic performance *S. mansoni* peptides and chimeric proteins antibody detection tests.

| Peptide/Antigen                                                                 | Peptide sequence                                                    | Serological assay | Sensitivity             | Specificity             | AUC& (95% CI)        | Reference                    |
|---------------------------------------------------------------------------------|---------------------------------------------------------------------|-------------------|-------------------------|-------------------------|----------------------|------------------------------|
| Smp_136560 (1564–1578)                                                          | ITEGNNREGNSEKV                                                      | Serum IgG ELISA   | 73.08%                  | 76.92%                  | 0.76 (0.6024–0.9213) | Gardenia B. F. Carvalho [16] |
| Smp_141860 (1694–1709)                                                          | NHSMKDDEDFSDIDK                                                     | Serum IgG ELISA   | 84.62%                  | 46.15%                  | 0.58 (0.316–0.8041)  |                              |
| Smp_093840(219–233)                                                             | TTNKDDTQINSAPS                                                      | Serum IgG ELISA   | 69.23%                  | 76.92%                  | 0.78 (0.6277–0.9374) |                              |
| Smp_126160(438–452)                                                             | LVTPESKYYSSLPGN                                                     | Serum IgG ELISA   | 84.62%                  | 69.23%                  | 0.82 (0.6871–0.9609) |                              |
| Smp_150390.1(216–230)                                                           | SLPSNAHNNDNNSD                                                      | Serum IgG ELISA   | 96.15%                  | 100%                    | 0.99 (0.9874–1.00)   |                              |
| Smp_167240(213–228)                                                             | QCCLDTQWNPAGTEYS                                                    | Serum IgG ELISA   | 53.85%                  | 53.85%                  | 0.51(0.3068–0.7198)  |                              |
| Smp_180240(339–353)                                                             | RDWPTTLTGAGGSTT                                                     | Serum IgG ELISA   | 73.08%                  | 92.31%                  | 0.87 (0.7633–0.9823) |                              |
| Sm041370                                                                        | QVFYKDMYSLWLADT                                                     | Serum IgG ELISA   | 88.24%                  | 100%                    | -                    | Marcelo D. Lopes [37]        |
| Sm140560                                                                        | MGFATGYFVHDIYHNI                                                    | Serum IgG ELISA   | 70.59%                  | 91.67%                  | -                    |                              |
| Sm156860                                                                        | QLCKDTSSRMKAAPQF                                                    | Serum IgG ELISA   | 47.06%                  | 91.67%                  | -                    |                              |
| Sm168240                                                                        | HTLVKSRLNGTIEFP                                                     | Serum IgG ELISA   | 64.71%                  | 83.33%                  | -                    |                              |
| Chimeric protein (Cathepsin B antigen and ET03 clone peptides chimeric protein) | Sm 31_81–100, Sm31_221–240, Sm 31_241–260, ET03_5–24 and ET03_34–53 | Serum IgG ELISA   | 86.8% (95% CI 74.1–94%) | 94.2% (95% CI 85–97.3%) | -                    | E. De Oliveira [36]          |

<https://doi.org/10.1371/journal.pone.0282233.t004>

In the present review, we identified two studies [16, 37] that investigated peptide based serum IgG ELISA and one study [36] that utilized a multi-peptide chimeric protein. Except for Smp\_167240 (213–228), Smp\_141860 (1694–1709), Smp\_141860 (1694–1706) and Sm 156860 which had poor diagnostic performances most peptides identified in this review had good diagnostic performances with sensitivities ranging from 67.71% to 96.15%, specificities ranging from 69.23% to 100% and AUC ranging from 0.76 (95% CI 0.6024–0.9213) to 0.99 (95% CI 0.987–100) (Table 4).

Oliveira and colleagues used a chimeric protein from a pool of 5 epitopes derived from *S. mansoni* proteins in a serum based IgG ELISA and demonstrated high diagnostic performances. The chimeric had a sensitivity of 86.8% (95% CI 74.1%–94%) and a specific of 94.2% (95% CI 85%–97.3%). They further explained that the high specificity was due to low cross-reactivity of the *S. mansoni* chemically synthesised immunodominant peptides with sera from non-infected individuals. They went on to explain that diagnostic sensitivity of the chimeric protein may be improved by the inclusion of other peptides, originating from the same or different proteins [36].

## Conclusion

This review identifies recombinant antigens that were grouped into eleven schistosome protein families' viz., SERPIN, Pur DNA binding protein, MEC 2, tetraspanin, peptidases, ferritins and

haemoglobinase for *S. haematobium*. Cheparones, MEGs proteins, SAPLIP and calreticulin were identified for *S. mansoni*. The tetraspanin CD63 antigen had the best overall performance for *S. haematobium* diagnosis. The tetraspanin CD63 antigen Serum IgG POC-ICTs had a sensitivity of 89% and a specificity of 100%. Peptide Smp\_150390.1 (216–230) serum based IgG ELISA had the best overall performance for *S. mansoni* diagnosis with a sensitivity of 96.15%, specificity of 100% and an AUC of 0.99. Synthetic peptides were reported to demonstrate good to excellent diagnostic performances. The possibility of construction of multi-peptide chimeric proteins could further improve the diagnostic accuracy of synthetic peptides. Together with the advantages associated with urine sampling technique due to its non-invasive nature, we recommend development of multi-peptide chimeric proteins urine based point of care tools that can be used in remote settings.

## Supporting information

**S1 File. Search strategy and results for all databases.**  
(PDF)

**S1 Table. PRISMA-P checklist.**  
(PDF)

**S2 Table. Studies included and excluded from the review after full text screening and reasons for exclusion.**  
(XLSX)

## Author Contributions

**Conceptualization:** Arthur Vengesai.

**Data curation:** Arthur Vengesai, Victor Muleya.

**Formal analysis:** Arthur Vengesai, Victor Muleya, Herald Midzi.

**Investigation:** Arthur Vengesai, Victor Muleya.

**Methodology:** Arthur Vengesai, Victor Muleya, Herald Midzi, Tryphine Vimbai Tinago, Isaac Chipako.

**Supervision:** Arthur Vengesai, Thajasvarie Naicker, Takafira Mduluza.

**Writing – original draft:** Arthur Vengesai, Victor Muleya, Herald Midzi, Tryphine Vimbai Tinago, Isaac Chipako, Marble Manuwa, Thajasvarie Naicker, Takafira Mduluza.

**Writing – review & editing:** Arthur Vengesai, Victor Muleya, Herald Midzi, Tryphine Vimbai Tinago, Isaac Chipako, Marble Manuwa, Thajasvarie Naicker, Takafira Mduluza.

## References

1. Leow CHY, Willis C, Leow CHY, Hofmann A, Jones M. Molecular characterization of *Schistosoma mansoni* tegument annexins and comparative analysis of antibody responses following parasite infection. *Mol Biochem Parasitol* [Internet]. 2019 Dec 1 [cited 2022 Mar 13]; 234. Available from: <https://pubmed.ncbi.nlm.nih.gov/31628972/> <https://doi.org/10.1016/j.molbiopara.2019.111231>
2. Armstrong M, Harris AR, D'Ambrosio M V., Coulibaly JT, Essien-Baidoo S, Ephraim RKD, et al. Point-of-Care Sample Preparation and Automated Quantitative Detection of *Schistosoma haematobium* Using Mobile Phone Microscopy. *Am J Trop Med Hyg* [Internet]. 2022 Mar 28 [cited 2022 Aug 10]; 106(5):1442–9. Available from: <https://pubmed.ncbi.nlm.nih.gov/35344927/> <https://doi.org/10.4269/ajtmh.21-1071>
3. Schistosomiasis [Internet]. [cited 2020 Jun 5]. <https://www.who.int/news-room/fact-sheets/detail/schistosomiasis>

4. WHO | World Health Organization [Internet]. [cited 2020 Jun 5]. <https://www.who.int/schistosomiasis/epidemiology/table/en/>
5. Beltrame A, Guerriero M, Angheben A, Gobbi F, Requena-Mendez A, Zammarchi L, et al. Accuracy of parasitological and immunological tests for the screening of human schistosomiasis in immigrants and refugees from African countries: An approach with Latent Class Analysis. *PLoS Negl Trop Dis* [Internet]. 2017 Jun 5 [cited 2022 Jan 28]; 11(6):e0005593. Available from: <https://journals.plos.org/plosntds/article?id=10.1371/journal.pntd.0005593> PMID: 28582412
6. Liu S, Zhou X, Piao X, Hou N, Shen Y, Zou Y, et al. Saposin-like Proteins, a Multigene Family of Schistosoma Species, are Biomarkers for the Immunodiagnosis of Schistosomiasis Japonica. *J Infect Dis* [Internet]. 2016 Oct 15 [cited 2022 Feb 14]; 214(8):1225–34. Available from: <https://academic.oup.com/jid/article/214/8/1225/2388065> <https://doi.org/10.1093/infdis/jiw188>
7. Aryeetey YA, Essien-Baidoo S, Larbi IA, Ahmed K, Amoah AS, Obeng BB, et al. Molecular Diagnosis of Schistosoma Infections in Urine Samples of School Children in Ghana. *Am J Trop Med Hyg* [Internet]. 2013 Jun 5 [cited 2022 Jan 9]; 88(6):1028–31. Available from: <https://www.ajtmh.org/view/journals/tpmd/88/6/article-p1028.xml> <https://doi.org/10.4269/ajtmh.12-0571> PMID: 23530072
8. Balog CIA, Alexandrov T, Derks RJ, Hensbergen PJ, van Dam GJ, Tukahebwa EM, et al. The feasibility of MS and advanced data processing for monitoring Schistosoma mansoni infection. *PROTEOMICS—Clin Appl* [Internet]. 2010 May 1 [cited 2022 Aug 22]; 4(5):499–510. Available from: <https://onlinelibrary.wiley.com/doi/full/10.1002/prca.200900158> PMID: 21137067
9. Diagnostic target product profiles for monitoring, evaluation and surveillance of schistosomiasis control programmes [Internet]. [cited 2022 Jan 28]. <https://www.who.int/publications/item/9789240031104>
10. Knopp S, Corstjens PLAM, Koukounari A, Cercamondi CI, Ame SM, Ali SM, et al. Sensitivity and Specificity of a Urine Circulating Anodic Antigen Test for the Diagnosis of Schistosoma haematobium in Low Endemic Settings. *PLoS Negl Trop Dis* [Internet]. 2015 May 14 [cited 2021 May 24]; 9(5):e0003752. Available from: <https://journals.plos.org/plosntds/article?id=10.1371/journal.pntd.0003752> PMID: 25973845
11. Fenta A, Hailu T, Alemu M, Nibret E, Amor A, Munshea A. Evaluating the performance of diagnostic methods for soil transmitted helminths in the Amhara National Regional State, Northwest Ethiopia. *BMC Infect Dis* [Internet]. 2020 Dec 1 [cited 2021 May 24]; 20(1):1–8. Available from: <https://doi.org/10.1186/s12879-020-05533-2> PMID: 33121458
12. Nikolay B, Brooker SJ, Pullan RL. Sensitivity of diagnostic tests for human soil-transmitted helminth infections: A meta-analysis in the absence of a true gold standard. *Int J Parasitol*. 2014 Oct 1; 44(11):765–74. <https://doi.org/10.1016/j.ijpara.2014.05.009> PMID: 24992655
13. Glinz D, Silué KD, Knopp S, Lohourignon LK, Yao KP, Steinmann P, et al. Comparing diagnostic accuracy of Kato-Katz, Koga Agar Plate, Ether-Concentration, and FLOTAC for Schistosoma mansoni and Soil-transmitted helminths. *PLoS Negl Trop Dis* [Internet]. 2010 Jul [cited 2021 May 24]; 4(7):e754. Available from: [www.plosntds.org](http://www.plosntds.org) <https://doi.org/10.1371/journal.pntd.0000754> PMID: 20651931
14. Frickmann H, Lunardon LM, Hahn A, Loderstädt U, Lindner AK, Becker SL, et al. Evaluation of a duplex real-time PCR in human serum for simultaneous detection and differentiation of Schistosoma mansoni and Schistosoma haematobium infections—cross-sectional study. *Travel Med Infect Dis*. 2021 May 1; 41:102035. <https://doi.org/10.1016/j.tmaid.2021.102035> PMID: 33775915
15. Zhu YC. Immunodiagnosis and its role in schistosomiasis control in China: a review. *Acta Trop* [Internet]. 2005 [cited 2022 Jan 28]; 96(2–3):130–6. Available from: <https://pubmed.ncbi.nlm.nih.gov/16143288/> <https://doi.org/10.1016/j.actatropica.2005.07.007>
16. Carvalho GBF, Resende DM, Siqueira LMV, Lopes MD, Lopes DO, Coelho PMZ, et al. Selecting targets for the diagnosis of Schistosoma mansoni infection: An integrative approach using multi-omic and immunoinformatics data. *PLoS One* [Internet]. 2017 Aug 1 [cited 2022 Jan 9]; 12(8):e0182299. Available from: <https://journals.plos.org/plosone/article?id=10.1371/journal.pone.0182299> PMID: 28817585
17. Tanaka M, Kildemoes AO, Chadeka EA, Cheruiyot BN, Sassa M, Moriyasu T, et al. Potential of antibody test using Schistosoma mansoni recombinant serpin and RP26 to detect light-intensity infections in endemic areas. 2021 Aug 1 [cited 2022 Feb 14]; 83. Available from: <https://pubmed.ncbi.nlm.nih.gov/33857597/>
18. Bezerra FSM, Leal JKF, Sousa MS, Pinheiro MCC, Ramos AN, Silva-Moraes V, et al. Evaluating a point-of-care circulating cathodic antigen test (POC-CCA) to detect Schistosoma mansoni infections in a low endemic area in north-eastern Brazil. *Acta Trop* [Internet]. 2018 Jun 1 [cited 2023 Jan 11]; 182:264–70. Available from: <https://pubmed.ncbi.nlm.nih.gov/29526480/> <https://doi.org/10.1016/j.actatropica.2018.03.002>
19. Straily A, Kavere EA, Wanjia D, Wiegand RE, Montgomery SP, Mwaki A, et al. Evaluation of the Point-of-Care Circulating Cathodic Antigen Assay for Monitoring Mass Drug Administration in a Schistosoma mansoni Control Program in Western Kenya. *Am J Trop Med Hyg* [Internet]. 2021 Jan 1 [cited 2023 Jan 11]; 106(1):303–11. Available from: <https://pubmed.ncbi.nlm.nih.gov/34749308/> <https://doi.org/10.4269/ajtmh.21-0599>



20. El Aswad BEDW, Doenhoff MJ, El Hadidi AS, Schwaebler WJ, Lynch NJ. Use of recombinant calreticulin and cercarial transformation fluid (CTF) in the serodiagnosis of *Schistosoma mansoni*. *Immunobiology*. 2011 Mar 1; 216(3):379–85. <https://doi.org/10.1016/j.imbio.2010.06.014> PMID: 20691496
21. Tricco AC, Lillie E, Zarin W, O'Brien KK, Colquhoun H, Levac D, et al. PRISMA extension for scoping reviews (PRISMA-ScR): Checklist and explanation [Internet]. Vol. 169, *Annals of Internal Medicine*. American College of Physicians; 2018 [cited 2021 Jan 14]. p. 467–73. <https://pubmed.ncbi.nlm.nih.gov/30178033/>
22. Peters MDJ, Godfrey CM, Khalil H, McInerney P, Parker D, Soares CB. Guidance for conducting systematic scoping reviews. *Int J Evid Based Healthc* [Internet]. 2015 Sep 1 [cited 2021 Jan 14]; 13(3):141–6. Available from: <https://pubmed.ncbi.nlm.nih.gov/26134548/> <https://doi.org/10.1097/XEB.000000000000050>
23. Arksey H, O'Malley L. Scoping studies: Towards a methodological framework. *Int J Soc Res Methodol Theory Pract* [Internet]. 2005 Feb [cited 2021 Jan 14]; 8(1):19–32. Available from: <https://www.tandfonline.com/doi/abs/10.1080/1364557032000119616>
24. Vengesai A, Naicker T, Kasambala M, Midzi H, Mduluzai-Jokonya T, Rusakaniko S, et al. Clinical utility of peptide microarrays in the serodiagnosis of neglected tropical diseases in sub-Saharan Africa: protocol for a diagnostic test accuracy systematic review. 2021 Jul [cited 2022 Jan 9]; 11(7):e042279. Available from: <https://pubmed.ncbi.nlm.nih.gov/34330850/>
25. Vengesai A, Kasambala M, Mutandadzi H, Mduluzai-Jokonyaid TL, Mduluzaid T, Naicker T, et al. Scoping review of the applications of peptide microarrays on the fight against human infections. *PLoS One* [Internet]. 2022 Jan [cited 2022 Feb 13]; 17(1):e0248666. Available from: <https://journals.plos.org/plosone/article?id=10.1371/journal.pone.0248666> PMID: 35077448
26. Khalid AQ, Bhuvanendran S, Magalingam KB, Ramdas P, Kumari M, Radhakrishnan AK. Clinically Relevant Genes and Proteins Modulated by Tocotrienols in Human Colon Cancer Cell Lines: Systematic Scoping Review. *Nutr* 2021, Vol 13, Page 4056 [Internet]. 2021 Nov 12 [cited 2022 Feb 13]; 13(11):4056. Available from: <https://www.mdpi.com/2072-6643/13/11/4056/html> <https://doi.org/10.3390/nu13114056> PMID: 34836311
27. Tamarozzi F, Fittipaldo VA, Orth HM, Richter J, Buonfrate D, Riccardi N, et al. Diagnosis and clinical management of hepatosplenic schistosomiasis: A scoping review of the literature. *PLoS Negl Trop Dis* [Internet]. 2021 Mar 1 [cited 2022 Feb 13]; 15(3):e0009191. Available from: <https://journals.plos.org/plosntds/article?id=10.1371/journal.pntd.0009191> PMID: 33764979
28. Firman S, Ramachandran R, Whelan K, Witard OC, O'Keeffe M. Protein status of people with phenylketonuria: a scoping review protocol. *BMJ Open* [Internet]. 2021 Sep 1 [cited 2022 Feb 13]; 11(9):e049883. Available from: <https://bmjopen.bmj.com/content/11/9/e049883> <https://doi.org/10.1136/bmjopen-2021-049883> PMID: 34521668
29. Edelman A, Taylor J, Ovseiko P V, Topp SM. The role of academic health centres in building equitable health systems: a systematic review protocol. *BMJ Open* [Internet]. 2017 May 1 [cited 2021 Jul 27]; 7(5):e015435. Available from: <https://bmjopen.bmj.com/content/7/5/e015435> <https://doi.org/10.1136/bmjopen-2016-015435> PMID: 28554932
30. Santano R, Rubio R, Grau-Pujol B, Escola V, Muchisse O, Cuamba I, et al. Evaluation of antibody serology to determine current helminth and *Plasmodium falciparum* infections in a co-endemic area in Southern Mozambique. *medRxiv* [Internet]. 2022 Jan 18 [cited 2022 Feb 21]; 2022.01.18.22268971. Available from: <https://www.medrxiv.org/content/10.1101/2022.01.18.22268971v1>
31. Mekonnen GG, Tedla BA, Pearson MS, Becker L, Field M, Amoah AS, et al. Characterisation of tetraspanins from *Schistosoma haematobium* and evaluation of their potential as novel diagnostic markers. *PLoS Negl Trop Dis* [Internet]. 2022 Jan 24 [cited 2022 Feb 14]; 16(1):e0010151. Available from: <https://journals.plos.org/plosntds/article?id=10.1371/journal.pntd.0010151> PMID: 35073344
32. Ogongo P, Kariuki TM, Wilson RA. Diagnosis of schistosomiasis mansoni: an evaluation of existing methods and research towards single worm pair detection. *Parasitology* [Internet]. 2018 Sep 1 [cited 2022 Mar 12]; 145(11):1355–66. Available from: <https://www.cambridge.org/core/journals/parasitology/article/abs/diagnosis-of-schistosomiasis-mansoni-an-evaluation-of-existing-methods-and-research-towards-single-worm-pair-detection/552001BF61F171FB60F11577DC42280A> <https://doi.org/10.1017/S0031182018000240> PMID: 29506583
33. Mambelli FS, Figueiredo BC, Morais SB, Assis NRG, Fonseca CT, Oliveira SC. Recombinant micro-exon gene 3 (MEG-3) antigens from *Schistosoma mansoni* failed to induce protection against infection but show potential for serological diagnosis. 2020 Apr 1 [cited 2022 Feb 14]; 204. Available from: <https://pubmed.ncbi.nlm.nih.gov/32001249/>
34. Heidepriem J, Kräling V, Dahlke C, Wolf T, Klein F, Addo MM, et al. Epitopes of Naturally Acquired and Vaccine-Induced Anti-Ebola Virus Glycoprotein Antibodies in Single Amino Acid Resolution. *Biotechnol J* [Internet]. 2020 Sep 1 [cited 2020 Nov 24]; 15(9):2000069. Available from: <https://onlinelibrary.wiley.com/doi/full/10.1002/biot.202000069> PMID: 32463974

35. Pearson MS, Tedla BA, Mekonnen GG, Proietti C, Becker L, Nakajima R, et al. Immunomics-guided discovery of serum and urine antibodies for diagnosing urogenital schistosomiasis: a biomarker identification study. *The Lancet Microbe* [Internet]. 2021 Nov 1 [cited 2022 Feb 14]; 2(11):e617–26. Available from: <http://www.thelancet.com/article/S2666524721001506/fulltext> [https://doi.org/10.1016/S2666-5247\(21\)00150-6](https://doi.org/10.1016/S2666-5247(21)00150-6) PMID: 34977830
36. de Oliveira EJ, Kanamura HY, Takei K, Hirata RDC, Valli LCP, Nguyen NY, et al. Synthetic peptides as an antigenic base in an ELISA for laboratory diagnosis of schistosomiasis mansoni. *Trans R Soc Trop Med Hyg* [Internet]. 2008 Apr 1 [cited 2022 Feb 15]; 102(4):360–6. Available from: <https://pubmed.ncbi.nlm.nih.gov/18314149/> <https://doi.org/10.1016/j.trstmh.2007.11.008>
37. Lopes MD, Oliveira FM, Coelho IEV, Passos MJF, Alves CC, Taranto AG, et al. Epitopes rationally selected through computational analyses induce T-cell proliferation in mice and are recognized by serum from individuals infected with *Schistosoma mansoni*. *Biotechnol Prog* [Internet]. 2017 May 1 [cited 2022 Feb 14]; 33(3):804–14. Available from: <https://pubmed.ncbi.nlm.nih.gov/28371522/> <https://doi.org/10.1002/btpr.2463>
38. Silva-Moraes V, Shollenberger LM, Castro-Borges W, Rabello ALT, Harn DA, Medeiros LCS, et al. Serological proteomic screening and evaluation of a recombinant egg antigen for the diagnosis of low-intensity *Schistosoma mansoni* infections in endemic area in Brazil. *PLoS Negl Trop Dis* [Internet]. 2019 Mar 1 [cited 2022 Feb 15]; 13(3):e0006974. Available from: <https://journals.plos.org/plosntds/article?id=10.1371/journal.pntd.0006974> PMID: 30870412
39. De Benedetti S, Di Pisa F, Fassi EMA, Cretich M, Musicò A, Frigerio R, et al. No Title. 2021 Apr 1 [cited 2022 Feb 14]; 9(4):322. <https://www.mdpi.com/2076-393X/9/4/322/html>
40. Tanigawa C, Fujii Y, Miura M, Nzou SM, Mwangi AW, Nagi S, et al. Species-Specific Serological Detection for Schistosomiasis by Serine Protease Inhibitor (SERPIN) in Multiplex Assay. *PLoS Negl Trop Dis* [Internet]. 2015 [cited 2020 May 20]; 9(8):e0004021. Available from: <https://journals.plos.org/plosntds/article?id=10.1371/journal.pntd.0004021> PMID: 26291988
41. Makarova E, Goes TS, Marcatto ALM, Leite MF, Goes AM. Serological differentiation of acute and chronic schistosomiasis using *Schistosoma mansoni* recombinant protein RP26. *Parasitol Int*. 2003 Dec 1; 52(4):269–79. [https://doi.org/10.1016/s1383-5769\(03\)00031-x](https://doi.org/10.1016/s1383-5769(03)00031-x) PMID: 14665383
42. Makarova E, Goes TS, Leite MF, Goes AM. Detection of IgG binding to *Schistosoma mansoni* recombinant protein RP26 is a sensitive and specific method for acute schistosomiasis diagnosis. *Parasitol Int* [Internet]. 2005 [cited 2022 Feb 15]; 54(1):69–74. Available from: <https://pubmed.ncbi.nlm.nih.gov/15710554/> <https://doi.org/10.1016/j.parint.2004.12.001>
43. Torlakovic EE, Francis G, Garratt J, Gilks B, Hyjek E, Ibrahim M, et al. Standardization of negative controls in diagnostic immunohistochemistry: Recommendations from the international Ad Hoc expert panel. *Appl Immunohistochem Mol Morphol* [Internet]. 2014 [cited 2022 May 10]; 22(4):241–52. Available from: [https://journals.lww.com/appliedimmunohist/Fulltext/2014/04000/Standardization\\_of\\_Negative\\_Controls\\_in\\_Diagnostic.1.aspx](https://journals.lww.com/appliedimmunohist/Fulltext/2014/04000/Standardization_of_Negative_Controls_in_Diagnostic.1.aspx) <https://doi.org/10.1097/PAI.000000000000069> PMID: 24714041
44. West R, Kobokovich A. Understanding the Accuracy of Diagnostic and Serology Tests: Sensitivity and Specificity Factsheet. 2020;
45. De Oliveira EJ, Kanamura HY, Takei K, Hirata RDC, Nguyen NY, Hirata MH. Application of synthetic peptides in development of a serologic method for laboratory diagnosis of schistosomiasis mansoni. *Mem Inst Oswaldo Cruz* [Internet]. 2006 [cited 2022 Feb 15]; 101(SUPPL. 1):355–7. Available from: <http://www.scielo.br/j/mioc/a/WvqqFd9X75Ly5ny6xcDzMmc/?lang=en>
46. Doenhoff MJ, Chiodini PL, Hamilton J V. Specific and sensitive diagnosis of schistosome infection: can it be done with antibodies? *Trends Parasitol* [Internet]. 2004 Jan 1 [cited 2022 May 10]; 20(1):35–9. Available from: <http://www.cell.com/article/S1471492203002939/fulltext> <https://doi.org/10.1016/j.pt.2003.10.019> PMID: 14700588
47. Test for Past Infection | CDC [Internet]. [cited 2022 May 10]. <https://www.cdc.gov/coronavirus/2019-ncov/testing/serology-overview.html>
48. Ochodo EA, Gopalakrishna G, Spek B, Reitsma JB, van Lieshout L, Polman K, et al. Circulating antigen tests and urine reagent strips for diagnosis of active schistosomiasis in endemic areas [Internet]. *Cochrane Database of Systematic Reviews* John Wiley and Sons Ltd; Mar 11, 2015. <https://www.cochranelibrary.com/cdsr/doi/10.1002/14651858.CD009579.pub2/full>
49. Martelli G, Di Girolamo C, Zammarchi L, Angheben A, Morandi M, Tais S, et al. Seroprevalence of five neglected parasitic diseases among immigrants accessing five infectious and tropical diseases units in Italy: a cross-sectional study. *Clin Microbiol Infect* [Internet]. 2017 May 1 [cited 2021 Jun 13]; 23(5):335.e1–335.e5. Available from: <https://doi.org/10.1016/j.cmi.2017.02.024> PMID: 28259548
50. Hinz R, Schwarz NG, Hahn A, Frickmann H. Serological approaches for the diagnosis of schistosomiasis—A review. Vol. 31, *Molecular and Cellular Probes*. Academic Press; 2017. p. 2–21.

51. Midzi N, Butterworth AE, Mduluzi T, Munyati S, Deelder AM, van Dam GJ. Use of circulating cathodic antigen strips for the diagnosis of urinary schistosomiasis. *Trans R Soc Trop Med Hyg* [Internet]. 2009 Jan [cited 2022 May 10]; 103(1):45–51. Available from: <https://pubmed.ncbi.nlm.nih.gov/18951599/> <https://doi.org/10.1016/j.trstmh.2008.08.018>
52. De Dood CJ, Hoekstra PT, Mngara J, Kalluvya SE, Van Dam GJ, Downs JA, et al. Refining diagnosis of schistosoma haematobium infections: Antigen and antibody detection in urine. *Front Immunol*. 2018 Nov 14; 9(NOV):2635. <https://doi.org/10.3389/fimmu.2018.02635> PMID: 30487796
53. Archer J, Lacourse JE, Webster BL, Stothard JR. An update on non-invasive urine diagnostics for human-infecting parasitic helminths: what more could be done and how? *Parasitology* [Internet]. 2020 Jul 1 [cited 2022 May 10]; 147(8):873–88. Available from: <https://pubmed.ncbi.nlm.nih.gov/31831084/> <https://doi.org/10.1017/S0031182019001732>
54. Noya O, Alarcón De Noya B, Losada S, Colmenares C, Guzmán C, Lorenzo MA, et al. Laboratory Diagnosis of Schistosomiasis in Areas of Low Transmission. A Review of a Line of Research. *Mem Inst Oswaldo Cruz, Rio Janeiro*. 2002; 97:167–9.
55. Morshed M, Sekirov I, McLennan M, Levett PN, Chahil N, Mak A, et al. Comparative Analysis of Capillary vs Venous Blood for Serologic Detection of SARS-CoV-2 Antibodies by RPOC Lateral Flow Tests. *Open forum Infect Dis* [Internet]. 2021 Mar 1 [cited 2023 Jan 11]; 8(3). Available from: <https://pubmed.ncbi.nlm.nih.gov/33723509/> <https://doi.org/10.1093/ofid/ofab043>
56. Zhou YP, Wu ZD, Yang LL, Sun X, You X, Yu XB, et al. Cloning, molecular characterization of a 13-kDa antigen from *Schistosoma japonicum*, Sj13, a putative salivary diagnosis candidate for Schistosomiasis japonica. *Parasitol Res* [Internet]. 2009 [cited 2022 Jul 6]; 105(5):1435–44. Available from: <https://pubmed.ncbi.nlm.nih.gov/19639340/> <https://doi.org/10.1007/s00436-009-1575-x>
57. Blum M, Chang HY, Chuguransky S, Grego T, Kandasamy S, Mitchell A, et al. The InterPro protein families and domains database: 20 years on. *Nucleic Acids Res* [Internet]. 2021 Jan 8 [cited 2022 Jul 15]; 49(D1):D344–54. Available from: <https://academic.oup.com/nar/article/49/D1/D344/5958491> <https://doi.org/10.1093/nar/gkaa977> PMID: 33156333
58. Yan Y, Liu S, Song G, Xu Y, Dissous C. Characterization of a novel vaccine candidate and serine proteinase inhibitor from *Schistosoma japonicum* (Sj serpin). *Vet Parasitol*. 2005 Jul 15; 131(1–2):53–60. <https://doi.org/10.1016/j.vetpar.2005.04.038> PMID: 15946799
59. Abdulla MH, Lim KC, McKerrow JH, Caffrey CR. Proteomic Identification of IPSE/alpha-1 as a Major Hepatotoxin Secreted by *Schistosoma mansoni* Eggs. *PLoS Negl Trop Dis* [Internet]. 2011 Oct [cited 2022 Jul 15]; 5(10):e1368. Available from: <https://journals.plos.org/plosntds/article?id=10.1371/journal.pntd.0001368> PMID: 22039561
60. Pakchotanont P, Molee P, Nuamtanong S, Limpanont Y, Chusongsang P, Limsomboon J, et al. Molecular characterization of serine protease inhibitor isoform 3, SmSPI, from *Schistosoma mansoni*. *Parasitol Res* [Internet]. 2016 Aug 1 [cited 2022 Jul 15]; 115(8):2981–94. Available from: <https://link.springer.com/article/10.1007/s00436-016-5053-y> PMID: 27083187
61. Bruhn H, Leippe M. Novel putative saposin-like proteins of *Entamoeba histolytica* different from amoebapores. *Biochim Biophys Acta—Biomembr*. 2001 Sep 3; 1514(1):14–20. [https://doi.org/10.1016/S0005-2736\(01\)00345-5](https://doi.org/10.1016/S0005-2736(01)00345-5) PMID: 11513801
62. Don TA, Bethony JM, Loukas A. Saposin-like proteins are expressed in the gastrodermis of *Schistosoma mansoni* and are immunogenic in natural infections. *Int J Infect Dis* [Internet]. 2008 Nov [cited 2022 Aug 18]; 12(6). Available from: <https://pubmed.ncbi.nlm.nih.gov/18571965/> <https://doi.org/10.1016/j.ijid.2007.10.007>
63. Mu Y, Gordon CA, Olveda RM, Ross AG, Olveda DU, Marsh JM, et al. Identification of a linear B-cell epitope on the *Schistosoma japonicum* saposin protein, SjSAP4: Potential as a component of a multi-epitope diagnostic assay. Morassutti A, editor. *PLoS Negl Trop Dis* [Internet]. 2022 Jul 11 [cited 2022 Aug 18]; 16(7):e0010619. Available from: <https://journals.plos.org/plosntds/article?id=10.1371/journal.pntd.0010619> PMID: 35816547
64. Jiang Y, Xu X, Qing X, Pan W. Identification and characterization of six novel tetraspanins from *Schistosoma japonicum*. *Parasites and Vectors* [Internet]. 2011 Sep 29 [cited 2022 Aug 18]; 4(1):1–11. Available from: <https://parasitesandvectors.biomedcentral.com/articles/10.1186/1756-3305-4-190> PMID: 21958506
65. Graeff-Teixeira C, Favero V, de Souza RP, Pascoal VF, Bittencourt HR, Fukushima M, et al. Use of *Schistosoma mansoni* soluble egg antigen (SEA) for antibody detection and diagnosis of schistosomiasis: The need for improved accuracy evaluations of diagnostic tools. *Acta Trop*. 2021 Mar 1; 215:105800. <https://doi.org/10.1016/j.actatropica.2020.105800> PMID: 33352167
66. List C, Qi W, Maag E, Gottstein B, Müller N, Felger I. Serodiagnosis of *Echinococcus* spp. infection: Explorative selection of diagnostic antigens by peptide microarray. *PLoS Negl Trop Dis* [Internet]. 2010 Aug 3 [cited 2020 Feb 26]; 4(8):e771. Available from: <https://pubmed.ncbi.nlm.nih.gov/ukzn.idm.oclc.org/20689813/> <https://doi.org/10.1371/journal.pntd.0000771>

67. Li Y, Lai D yun, Lei Q, Xu Z wei, Wang F, Hou H, et al. Systematic evaluation of IgG responses to SARS-CoV-2 spike protein-derived peptides for monitoring COVID-19 patients. 2021 [cited 2022 Jun 11]; 18(3). Available from: /pmc/articles/PMC7821179/
68. Noya O, Alarcón de Noya B, Guzmán F, Bermúdez H. Immunogenicity of Sm32 synthetic peptides derived from the *Schistosoma mansoni* adult worm. *Immunol Lett* [Internet]. 2003 Sep 8 [cited 2022 Feb 15]; 88(3):211–9. Available from: <https://pubmed.ncbi.nlm.nih.gov/12941480/> [https://doi.org/10.1016/s0165-2478\(03\)00086-5](https://doi.org/10.1016/s0165-2478(03)00086-5)
69. Noya O, Patarroyo M, Guzman F, de Noya B. Immunodiagnosis of Parasitic Diseases with Synthetic Peptides. *Curr Protein Pept Sci* [Internet]. [cited 2020 Feb 26]; 4(4):299–308. Available from: <http://www.ncbi.nlm.nih.gov/pubmed/14529537>
70. De Benedetti S, Di Pisa F, Fassi EMA, Cretich M, Musicò A, Frigerio R, et al. Structure, Immunoreactivity, and In Silico Epitope Determination of SmSPI *S. mansoni* Serpin for Immunodiagnostic Application. *Vaccines* 2021, Vol 9, Page 322 [Internet]. 2021 Apr 1 [cited 2022 May 24];9(4):322. Available from: <https://www.mdpi.com/2076-393X/9/4/322/htm> <https://doi.org/10.3390/vaccines9040322> PMID: 33915716
